# Supplementary material for: Bile Acid Regulates the Colonization and Dissemination of Candida albicans from the Gastrointestinal Tract by Controlling Host Defense System and Microbiota
Source: J Fungi (Basel). 2021 Nov 30;7(12):1030. doi: 10.3390/jof7121030 (PMC8708873; doi:10.3390/jof7121030)
Supplement: Supplementary file 1 [file jof-07-01030-s001.zip › jof-1468224-supplementary/Bile acids levels.xlsx]

## Sheet: Sheet2
	Abundance of bile acids from cecal contents from individual mice samples
	Control					Antibiotic-treated
Bile acids	Mice#1	Mice#2	Mice#3	Mice#4	Mice#5	Mice#1	Mice#2	Mice#3	Mice#4	Mice#5
TCA	15267.6	12197.8	15821.7	10801.8	10909.1	375029	545183	464489	477626	597585
TMCA	239.396	191.854	264.725	160.7	157.642	4455.81	7134.72	5065.38	7810.67	6816.31
TCDCA	654.079	564.524	261.963	176.374	122.403	956.071	1899.81	1737.32	3061.98	1965.47
TUDCA	654.079	564.524	261.963	176.374	122.403	1022.42	1665.27	1553.52	1853.35	1698.34
TDCA	134.693	162.26	125.602	77.3338	79.0303	219.547	438.902	472.203	667.408	435.639
TLCA	54.379	112.064	14.017	6.59306	2.30181	168.971	257.534	92.299	126.929	305.379
